# Supplementary material for: Solvothermal synthesis of VO2 nanoparticles with locally patched V2O5 surface layer and their morphology-dependent catalytic properties for the oxidation of alcohols
Source: Royal Society of Chemistry journal article supplement (doi:10.1039/d3dt02605a), 2024-01-01
Supplement: d3dt02605a1.pdf [file d3dt02605a1.pdf]

## Supplementary Information

### Solvothermal Synthesis of VO<sub>2</sub> Nanoparticles with Locally Patched V<sub>2</sub>O<sub>5</sub> Surface Layer and their Morphology-Dependent Catalytic Properties for the Oxidation of Alcohols

Received 00th January 20xx,  
Accepted 00th January 20xx

DOI: 10.1039/x0xx00000x

Dorothea Gömpel,<sup>a</sup> Muhammad Nawaz Tahir,<sup>\*b,c</sup> Mujeeb Khan,<sup>d</sup> Syed Farooq Adil,<sup>d</sup> Mohammed Rafi Shaik,<sup>d</sup> Mufsir Kuniyil,<sup>d</sup> Abdulrahman Al-Warthan,<sup>d</sup> and Wolfgang Tremel<sup>\*a</sup>

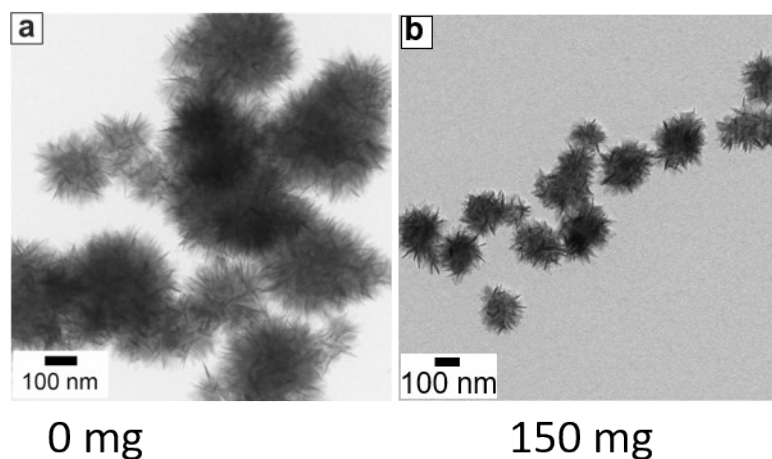

**Figure S1.** Transmission electron microscopy images showing the influence of amount of surfactant F-127 on the morphology of VO<sub>x</sub> nanourchins synthesized without F-127, (a) and 150 mg of F-127(b)

<sup>a</sup> Chemistry Department, Johannes Gutenberg-Universität Mainz, Duesbergweg 10-14, D-55128 Mainz, Germany. E-mail: tremel@uni-mainz.de.

<sup>b</sup> Chemistry Department, King Fahd University of Petroleum & Minerals, Dhahran 31261, Kingdom of Saudi Arabia. E-mail: muhammad.tahir@kfupm.edu.sa

<sup>c</sup> Interdisciplinary Research Center for Hydrogen and Energy Storage (IRC-HES), King Fahd University of Petroleum and Minerals, Dhahran 31261, Saudi Arabia

<sup>d</sup> Department of Chemistry, College of Science, King Saud University, P.O. Box 2455, Riyadh 11451, Kingdom of Saudi Arabia.

† Footnotes relating to the title and/or authors should appear here.

Electronic Supplementary Information (ESI) available: [details of any supplementary information available should be included here]. See DOI: 10.1039/x0xx00000x

### Analysis of Oxidation Catalysis

To determine the product selectivity, the liquid products were analysed by gas chromatography, Agilent 7890A (Agilent Technologies Inc., Santa Clara, CA, USA) equipped with a flame ionization detector (FID), split injection (1:100) and a 19019S001 HP-PONA column. Helium was used as the carrier gas. For benzyl alcohol oxidation the inlet and detector were kept at temperature of 210 °C and 250 °C, respectively. The oven was started at 50 °C and hold for a minute later increased up to 160 °C with a ramp rate of 5 °C/min. On the other hand, for furfuryl alcohol oxidation the inlet and detector were kept at temperature of 190 °C and 250 °C, respectively. The oven was started at 80 °C and hold for 2 minute later increased up to 170 °C with a temperature ramp rate of 10 °C/min.

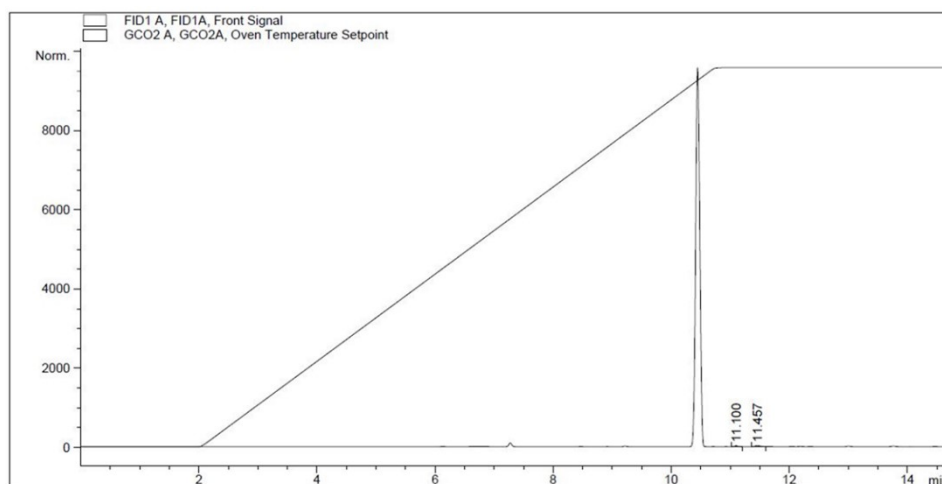

**Figure S2.** GC chromatogram of benzyl alcohol oxidation using VO<sub>2</sub> nano-urchins.

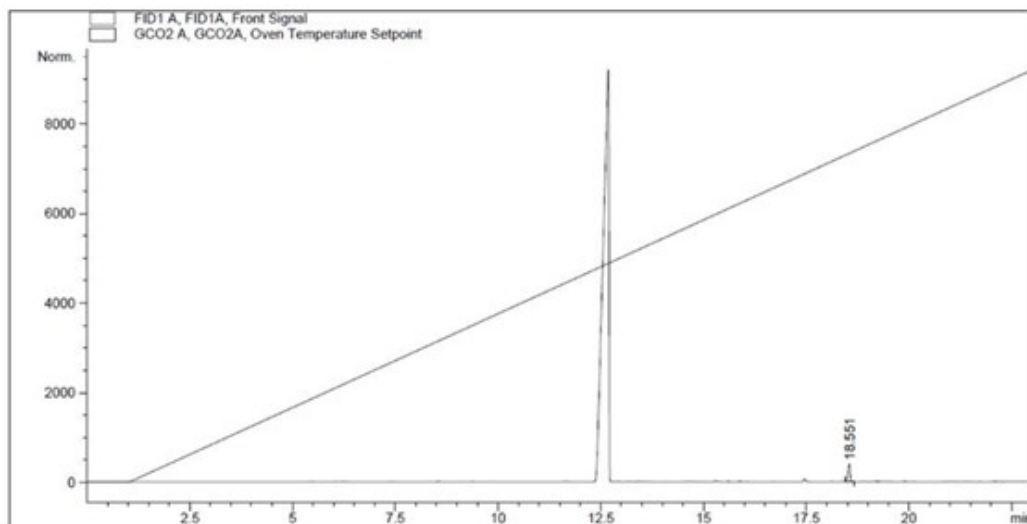

**Figure S3.** GC chromatogram of furfuryl alcohol oxidation using VO<sub>2</sub> nano-urchins.

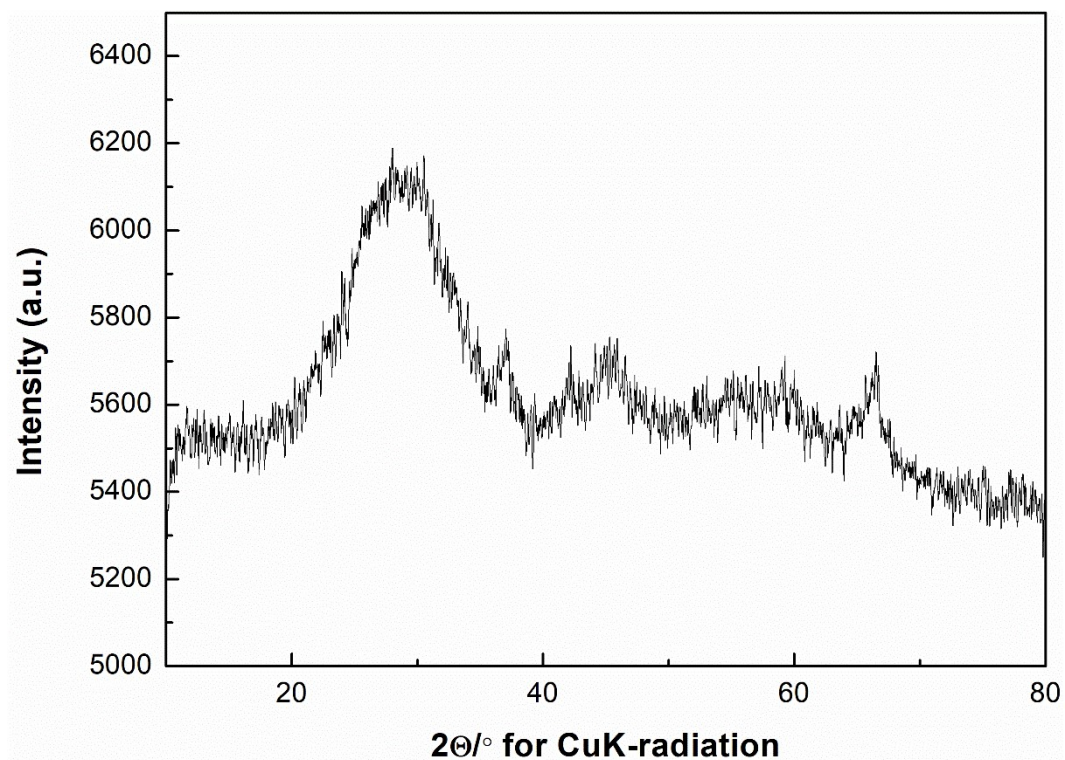

**Figure S4.** X-ray diffractogram of re-used VO<sub>2</sub> nano-urchin catalyst.

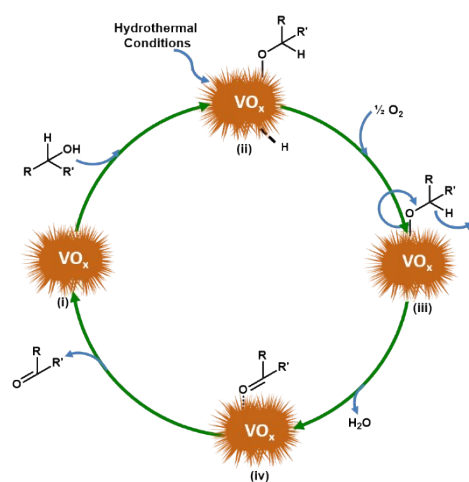

**Figure S5.** Proposed reaction mechanism for the oxidation of alcohols on  $\text{VO}_2$  surfaces

**Table S1.** Comparison of the catalytic activity of the catalysts for the oxidation of alcohols.

| Catalyst                                                     | Temperature (°C) | Time (hrs) | Conversion (%) | Reference    |
|--------------------------------------------------------------|------------------|------------|----------------|--------------|
| V <sub>2</sub> O <sub>5</sub>                                | rt               | 36         | 74             | 81           |
| V <sub>2</sub> O <sub>5</sub>                                | 82               | 5          | 30             | 82           |
| V <sub>2</sub> O <sub>5</sub> @TiO <sub>2</sub>              | 50               | 1          | 35             | 83           |
| V <sub>2</sub> O <sub>5</sub> @GO                            | 80               | 2          | 32             | 84           |
| V <sub>2</sub> O <sub>5</sub> @SrTiO <sub>3</sub>            | 80               | 6          | 94             | 85           |
| V <sub>2</sub> O <sub>5</sub> @C <sub>3</sub> N <sub>4</sub> | rt               | 42         | 64             | 86           |
| VO <sub>2</sub> /nano-urchin                                 | 150              | 4          | 100            | Our catalyst |
